# Supplementary material
Source: HighWire-hosted journal article supplement (https://svn.bmj.com/content/8/5/387)
Supplement: inline-supplementary-material-1 [file inline-supplementary-material-1.pdf]

**sTable 1.** Comparison of ipsilateral vs contralateral plaque characteristics in 155 patients who had bilateral plaques

|                           | Ipsilateral plaque<br>(n=155) | Contralateral plaque<br>(n=155) | P value |
|---------------------------|-------------------------------|---------------------------------|---------|
| Plaque morphology         |                               |                                 |         |
| PB (mean $\pm$ SD)        | 79.41 $\pm$ 8.33              | 70.52 $\pm$ 14.52               | < 0.001 |
| RI (mean $\pm$ SD)        | 1.03 $\pm$ 0.14               | 1.01 $\pm$ 0.10                 | 0.161   |
| %LRNC (mean $\pm$ SD)     | 22.97 $\pm$ 11.43             | 19.42 $\pm$ 9.75                | < 0.001 |
| Stenosis (mean $\pm$ SD)  | 68.97 $\pm$ 15.55             | 51.16 $\pm$ 19.89               | < 0.001 |
| Plaque composition        |                               |                                 |         |
| FCR (n, %)                | 77 (49.7)                     | 74 (47.7)                       | 0.788   |
| DPS (n, %)                | 88 (56.8)                     | 82 (52.9)                       | 0.504   |
| IPH (n, %)                | 14 (9.0)                      | 9 (5.8)                         | 0.359   |
| Complicated plaque (n, %) | 90 (58.1)                     | 82 (52.9)                       | 0.350   |

Paired t test was used for continuous variables, and McNemar test for categorical variables. Abbreviations: PB = plaque burden; RI = remodeling index; LRNC = lipid-rich necrotic core; FCR = fibrous cap rupture; DPS = discontinuity of plaque surface; IPH = intraplaque hemorrhage; SD = standard deviation. P value = comparison of plaque causing any stenosis ipsilateral vs contralateral to stroke.

**sTable 2.** Logistic regression analysis for an index ischemic stroke in 155 patients who had bilateral plaques

|                          | Model 1             |         | Model 2             |         |
|--------------------------|---------------------|---------|---------------------|---------|
|                          | OR (95% CI)         | P value | OR (95% CI)         | P value |
| PB (per 10% increase)    | 2.664 (1.853-3.828) | < 0.001 | 0.501 (0.259-0.966) | 0.039   |
| RI (per 0.1 increase)    | 1.091 (0.826-1.440) | 0.541   | 2.207 (1.416-3.439) | < 0.001 |
| %LRNC (per 10% increase) | 1.044 (1.003-1.086) | 0.036   | 1.048 (1.000-1.098) | 0.052   |
| Complicated plaque       | 0.770 (0.371-1.597) | 0.483   | 1.456(0.559-3.789)  | 0.442   |

Conditional logistic regression analysis was performed to evaluate independent predictors for an index ischemic stroke based on the comparison of plaques ipsilateral vs contralateral to stroke. Model 1 = based on the comparison of plaques ipsilateral vs contralateral to stroke in 155 patients; Model 2 = additionally adjusted luminal stenosis; PB = plaque burden; RI = remodeling index; LRNC = lipid-rich necrotic core; OR = odds ratio; CI = confidence interval.
